# Supplementary material for: The Complete Genome of an Endogenous Nimavirus (Nimav-1_LVa) From the Pacific Whiteleg Shrimp Penaeus (Litopenaeus) Vannamei
Source: MDPI journal article supplement (doi:10.3390/genes11010094), 2020-01-14
Supplement: s1 [file s1]

FigS3

|                |                                                                                           |     |
|----------------|-------------------------------------------------------------------------------------------|-----|
| 034p/212       | G I I T I I Q N S N D N I L D P I Y - I K S N V C I C H Q C D C A T L E P                 | 45  |
| 139p/165       | S I V I A Y D L D E G D V F D P K Y - R K A N I C - - - - -                               | 25  |
| GBG35402.1/207 | A E N P R Y L K S V G D I F A P E F - R K E N I C I C Q Q C N C V A M K P                 | 37  |
| GBG35398.1/223 | A K N P Q Y Q L I D G D I F D L T F - R K P N V C I C Q Q C N C V A L K T                 | 37  |
| AAL33210.1/204 | S G K V T Y E I V E G G L L N N K Y L L D G G A A I C L Q S N C V A R K R                 | 39  |
|                |                                                                                           |     |
|                | G - - L Y C D M I K H F G R Y I N P Y R Y R N P M V Y G S N L A T V V T R A Q P G T I D - | 88  |
|                | - - - - - N I T S I D T R G Y P G T I E -                                                 | 40  |
|                | G - - L S K S I A D T F G A Y T N P Y G R R K A Q - - S K N I A S Y A T R S D P G T I E - | 78  |
|                | G - - L S K D I A N M F G L Y A N S Y A R R K G K - - Y T N I A D P Q S R G V P G S L E - | 78  |
|                | A G S L H D N L F K M L G - F G D P Y K Q R R G K T N S K N L A I I E D R P Q L G S V S V | 84  |
|                |                                                                                           |     |
|                | F C N G V P C V V N L F D R Y - - - - - L P S N Y S I G I P T                             | 114 |
|                | F C K G V P C V A N L F I G N R Y A - - - - - I R D E Y M - - - -                         | 64  |
|                | I C K G V P C V A N F F G Q Y M Y G - - - - - K P G E Y Q H S S W -                       | 106 |
|                | F C K G T P C V A N L F S Q Y M Y G - - - - - K P G Q Y N V S V K -                       | 106 |
|                | F C S M T - - - F L F A Q Y N M G N G R K C Y F P N D K E Y V E S C K -                   | 125 |
|                |                                                                                           |     |
|                | D E H M R L G I A R D Y L Q D R Q L Y F E S C L D H L L Y D L V N I H T Q I D T V V F     | 157 |
|                | D G H I V I N - - - D S K L Y R E A Y F K A C L D R L L D D L I S V H R D I D T I V F     | 104 |
|                | D T N I K D G I N K D T S R D R E L Y F E I C L N E L Y E E L T T T H T E I D T V V F     | 149 |
|                | D D D L M K G I T L D T Y D T R E E Y M R T C L D N L L E I L A N N H A D I D T V V F     | 149 |
|                | K H E R V H K S S T E M K R L R L Y Y F N K C L H A I A K S - - P A M K K Y N K I I F     | 166 |
|                |                                                                                           |     |
|                | D I E I K C I K S F V D K L V L A K N F D I G G - - I Q Y R G L V S E F A D K I K         | 210 |
|                | P Y E I G C G A A - - - - - G G N W V K Y E R L I S Q F A F E L I                         | 132 |
|                | P Y N I G C G P A - - - - - G G N W T R Y E E M I S R F A D R F T                         | 177 |
|                | P Y K I G C G L A - - - - - G G N W T R Y V E M I N N F T D K F M                         | 177 |
|                | P A R I G C A A A - - - - - G G D W E K Y H A S I R D F S T I I D                         | 194 |
