# Supplementary material for: The Complete Genome of an Endogenous Nimavirus (Nimav-1_LVa) From the Pacific Whiteleg Shrimp Penaeus (Litopenaeus) Vannamei
Source: MDPI journal article supplement (doi:10.3390/genes11010094), 2020-01-14
Supplement: s1 [file s1]

**Talbe S1:** Genomic fragments derived from Nimav-1\_LVa in order of descending length. Fragment with bold name are those illustrated in figure 1.

| Fragment    | Loci           | L-star | L-end  | virus       | v-star | v-end  | strand | identity | Length |
|-------------|----------------|--------|--------|-------------|--------|--------|--------|----------|--------|
| <b>F259</b> | NW_020871249.1 | 409780 | 456533 | Nimav-1_LVa | 114474 | 161156 | d      | 0.9949   | 46683  |
| <b>F268</b> | NW_020871279.1 | 70471  | 112901 | Nimav-1_LVa | 161402 | 203789 | d      | 0.9969   | 42388  |
| <b>F375</b> | NW_020872607.1 | 395519 | 433268 | Nimav-1_LVa | 118207 | 156129 | d      | 0.9959   | 37923  |
| <b>F363</b> | NW_020872505.1 | 203037 | 239990 | Nimav-1_LVa | 192177 | 229348 | d      | 0.9951   | 37172  |
| <b>F194</b> | NW_020870348.1 | 297574 | 333166 | Nimav-1_LVa | 1      | 35601  | d      | 0.9954   | 35601  |
| <b>F276</b> | NW_020871384.1 | 28926  | 63318  | Nimav-1_LVa | 189899 | 224374 | d      | 0.9897   | 34476  |
| <b>F120</b> | NW_020870086.1 | 109003 | 143107 | Nimav-1_LVa | 144190 | 178448 | d      | 0.9969   | 34259  |
| <b>F341</b> | NW_020872253.1 | 829034 | 862550 | Nimav-1_LVa | 56108  | 89833  | d      | 0.9713   | 33726  |
| <b>F138</b> | NW_020870086.1 | 331695 | 364870 | Nimav-1_LVa | 244280 | 277761 | d      | 0.9936   | 33482  |
| <b>F192</b> | NW_020870319.1 | 537827 | 570208 | Nimav-1_LVa | 236503 | 268884 | c      | 0.9973   | 32382  |
| <b>F349</b> | NW_020872253.1 | 958712 | 989885 | Nimav-1_LVa | 94358  | 125802 | d      | 0.9932   | 31445  |
| <b>F359</b> | NW_020872350.1 | 91571  | 122397 | Nimav-1_LVa | 114645 | 145594 | c      | 0.9955   | 30950  |

|             |                |        |        |             |        |        |   |        |       |
|-------------|----------------|--------|--------|-------------|--------|--------|---|--------|-------|
| <b>F141</b> | NW_020870185.1 | 412648 | 441464 | Nimav-1_LVa | 135801 | 164891 | c | 0.9778 | 29091 |
| <b>F020</b> | NW_020868486.1 | 380179 | 407460 | Nimav-1_LVa | 234722 | 262488 | c | 0.9933 | 27767 |
| <b>F202</b> | NW_020870398.1 | 142969 | 170294 | Nimav-1_LVa | 9961   | 37650  | d | 0.9921 | 27690 |
| <b>F340</b> | NW_020872253.1 | 801712 | 828925 | Nimav-1_LVa | 73941  | 101447 | d | 0.9908 | 27507 |
| <b>F329</b> | NW_020872253.1 | 625915 | 652962 | Nimav-1_LVa | 71542  | 98323  | d | 0.9817 | 26782 |
| <b>F269</b> | NW_020871279.1 | 112916 | 139632 | Nimav-1_LVa | 205226 | 231984 | d | 0.9946 | 26759 |
| F182        | NW_020870259.1 | 252256 | 277847 | Nimav-1_LVa | 247660 | 273517 | c | 0.9963 | 25858 |
| <b>F170</b> | NW_020870185.1 | 591020 | 615779 | Nimav-1_LVa | 24352  | 49341  | d | 0.9929 | 24990 |
| <b>F052</b> | NW_020868730.1 | 92929  | 117620 | Nimav-1_LVa | 44635  | 69399  | c | 0.9957 | 24765 |
| F348        | NW_020872253.1 | 934847 | 958580 | Nimav-1_LVa | 70536  | 94037  | d | 0.9892 | 23502 |
| F289        | NW_020871640.1 | 130841 | 153404 | Nimav-1_LVa | 110172 | 132928 | d | 0.9815 | 22757 |
| F060        | NW_020869103.1 | 420666 | 443332 | Nimav-1_LVa | 141895 | 164621 | c | 0.9974 | 22727 |
| F330        | NW_020872253.1 | 673600 | 696257 | Nimav-1_LVa | 78984  | 101723 | d | 0.9947 | 22740 |
| <b>F339</b> | NW_020872253.1 | 779215 | 801611 | Nimav-1_LVa | 64250  | 86765  | d | 0.9931 | 22516 |

|             |                |         |         |             |        |        |   |        |       |
|-------------|----------------|---------|---------|-------------|--------|--------|---|--------|-------|
| F116        | NW_020870086.1 | 69928   | 92341   | Nimav-1_LVa | 89616  | 112087 | d | 0.9959 | 22472 |
| F242        | NW_020871127.1 | 394166  | 416176  | Nimav-1_LVa | 244510 | 266782 | d | 0.9905 | 22273 |
| <b>F353</b> | NW_020872253.1 | 1020118 | 1041815 | Nimav-1_LVa | 94064  | 116066 | c | 0.9951 | 22003 |
| F327        | NW_020872253.1 | 582933  | 604722  | Nimav-1_LVa | 72449  | 94393  | d | 0.9903 | 21945 |
| F223        | NW_020870747.1 | 308573  | 330115  | Nimav-1_LVa | 73906  | 95273  | d | 0.9898 | 21368 |
| F016        | NW_020868486.1 | 338874  | 359880  | Nimav-1_LVa | 242203 | 263481 | d | 0.9933 | 21279 |
| <b>F038</b> | NW_020868486.1 | 647228  | 667915  | Nimav-1_LVa | 45540  | 66420  | c | 0.9879 | 20881 |
| <b>F064</b> | NW_020869331.1 | 131429  | 152178  | Nimav-1_LVa | 259084 | 279905 | d | 0.9968 | 20822 |
| F125        | NW_020870086.1 | 168464  | 188942  | Nimav-1_LVa | 150266 | 170807 | c | 0.9938 | 20542 |
| F335        | NW_020872253.1 | 732099  | 751604  | Nimav-1_LVa | 76178  | 95776  | d | 0.9948 | 19599 |
| F303        | NW_020871803.1 | 29035   | 48337   | Nimav-1_LVa | 59340  | 78876  | c | 0.9904 | 19537 |
| F025        | NW_020868486.1 | 469316  | 488454  | Nimav-1_LVa | 143024 | 162150 | c | 0.9864 | 19127 |
| F091        | NW_020869804.1 | 265397  | 284232  | Nimav-1_LVa | 127098 | 146085 | c | 0.9940 | 18988 |
| F333        | NW_020872253.1 | 708364  | 727157  | Nimav-1_LVa | 82059  | 100990 | d | 0.9946 | 18932 |

|             |                |        |        |             |        |        |   |        |       |
|-------------|----------------|--------|--------|-------------|--------|--------|---|--------|-------|
| <b>F364</b> | NW_020872505.1 | 240095 | 258708 | Nimav-1_LVa | 217341 | 236122 | d | 0.9902 | 18782 |
| F187        | NW_020870265.1 | 174162 | 192501 | Nimav-1_LVa | 15757  | 34161  | c | 0.9901 | 18405 |
| F270        | NW_020871279.1 | 139905 | 158418 | Nimav-1_LVa | 232452 | 250840 | d | 0.9935 | 18389 |
| F144        | NW_020870185.1 | 454291 | 472511 | Nimav-1_LVa | 107353 | 125664 | c | 0.9895 | 18312 |
| F204        | NW_020870398.1 | 178615 | 196627 | Nimav-1_LVa | 44638  | 62878  | d | 0.9848 | 18241 |
| F044        | NW_020868486.1 | 736532 | 754124 | Nimav-1_LVa | 235880 | 253955 | c | 0.9846 | 18076 |
| <b>F127</b> | NW_020870086.1 | 210485 | 228262 | Nimav-1_LVa | 156242 | 174265 | d | 0.9924 | 18024 |
| F321        | NW_020872253.1 | 480882 | 498595 | Nimav-1_LVa | 44728  | 62727  | d | 0.9850 | 18000 |
| <b>F037</b> | NW_020868486.1 | 544073 | 561355 | Nimav-1_LVa | 1      | 17531  | c | 0.9927 | 17531 |
| <b>F266</b> | NW_020871249.1 | 491419 | 508982 | Nimav-1_LVa | 185979 | 203499 | d | 0.9904 | 17521 |
| F250        | NW_020871249.1 | 215934 | 233058 | Nimav-1_LVa | 246486 | 263888 | c | 0.9924 | 17403 |
| F326        | NW_020872253.1 | 565462 | 582745 | Nimav-1_LVa | 83028  | 100427 | d | 0.9950 | 17400 |
| F233        | NW_020871127.1 | 341442 | 358438 | Nimav-1_LVa | 262608 | 279905 | c | 0.9607 | 17298 |
| <b>F315</b> | NW_020872166.1 | 127642 | 144638 | Nimav-1_LVa | 262608 | 279905 | c | 0.9894 | 17298 |

|             |                |         |         |             |        |        |   |        |       |
|-------------|----------------|---------|---------|-------------|--------|--------|---|--------|-------|
| F053        | NW_020868730.1 | 117922  | 134701  | Nimav-1_LVa | 25881  | 43027  | c | 0.9872 | 17147 |
| F011        | NW_020868486.1 | 281684  | 298608  | Nimav-1_LVa | 191079 | 208123 | d | 0.9923 | 17045 |
| F157        | NW_020870185.1 | 535337  | 552566  | Nimav-1_LVa | 2807   | 19770  | c | 0.9865 | 16964 |
| F024        | NW_020868486.1 | 447658  | 464418  | Nimav-1_LVa | 150598 | 167432 | c | 0.9943 | 16835 |
| F322        | NW_020872253.1 | 510564  | 526995  | Nimav-1_LVa | 57708  | 74380  | d | 0.9885 | 16673 |
| F305        | NW_020871803.1 | 82567   | 99115   | Nimav-1_LVa | 8165   | 24785  | c | 0.9815 | 16621 |
| F336        | NW_020872253.1 | 751705  | 768008  | Nimav-1_LVa | 79055  | 95483  | d | 0.9947 | 16429 |
| F346        | NW_020872253.1 | 908948  | 924995  | Nimav-1_LVa | 21423  | 37650  | d | 0.9925 | 16228 |
| F281        | NW_020871640.1 | 51524   | 67291   | Nimav-1_LVa | 49702  | 65800  | d | 0.9931 | 16099 |
| F205        | NW_020870398.1 | 208127  | 223965  | Nimav-1_LVa | 35967  | 51781  | c | 0.9668 | 15815 |
| <b>F374</b> | NW_020872515.1 | 1081798 | 1097442 | Nimav-1_LVa | 1      | 15605  | d | 0.9950 | 15605 |
| F190        | NW_020870265.1 | 198003  | 213484  | Nimav-1_LVa | 1      | 15586  | c | 0.9946 | 15586 |
| F156        | NW_020870185.1 | 520205  | 535335  | Nimav-1_LVa | 5712   | 20945  | c | 0.9764 | 15234 |
| F225        | NW_020870747.1 | 333884  | 348901  | Nimav-1_LVa | 103513 | 118628 | d | 0.9948 | 15116 |

|      |                |         |         |             |        |        |   |        |       |
|------|----------------|---------|---------|-------------|--------|--------|---|--------|-------|
| F227 | NW_020870747.1 | 351320  | 366321  | Nimav-1_LVa | 119553 | 134648 | d | 0.9934 | 15096 |
| F302 | NW_020871791.1 | 165755  | 180395  | Nimav-1_LVa | 262348 | 277175 | d | 0.9931 | 14828 |
| F015 | NW_020868486.1 | 324400  | 338873  | Nimav-1_LVa | 235931 | 250712 | d | 0.9906 | 14782 |
| F296 | NW_020871791.1 | 118843  | 133544  | Nimav-1_LVa | 246449 | 261234 | d | 0.9941 | 14786 |
| F256 | NW_020871249.1 | 285536  | 300085  | Nimav-1_LVa | 262481 | 277177 | d | 0.9942 | 14697 |
| F106 | NW_020869804.1 | 390929  | 405555  | Nimav-1_LVa | 151400 | 166046 | d | 0.9938 | 14647 |
| F352 | NW_020872253.1 | 1005314 | 1019863 | Nimav-1_LVa | 102694 | 117199 | c | 0.9811 | 14506 |
| F244 | NW_020871127.1 | 418207  | 432598  | Nimav-1_LVa | 265426 | 279904 | d | 0.9940 | 14479 |
| F245 | NW_020871127.1 | 433149  | 447467  | Nimav-1_LVa | 265445 | 279905 | d | 0.9957 | 14461 |
| F251 | NW_020871249.1 | 233059  | 247455  | Nimav-1_LVa | 108078 | 122542 | c | 0.9963 | 14465 |
| F275 | NW_020871295.1 | 649277  | 663506  | Nimav-1_LVa | 5154   | 19459  | c | 0.9939 | 14306 |
| F328 | NW_020872253.1 | 604723  | 618853  | Nimav-1_LVa | 79925  | 94239  | c | 0.9801 | 14315 |
| F304 | NW_020871803.1 | 48427   | 62486   | Nimav-1_LVa | 45304  | 59535  | c | 0.9800 | 14232 |
| F101 | NW_020869804.1 | 339915  | 353972  | Nimav-1_LVa | 94897  | 109052 | d | 0.9941 | 14156 |

|      |                |        |        |             |        |        |   |        |       |
|------|----------------|--------|--------|-------------|--------|--------|---|--------|-------|
| F345 | NW_020872253.1 | 894978 | 908832 | Nimav-1_LVa | 71542  | 85477  | d | 0.9781 | 13936 |
| F271 | NW_020871279.1 | 173999 | 187865 | Nimav-1_LVa | 251348 | 265126 | d | 0.9774 | 13779 |
| F030 | NW_020868486.1 | 509481 | 522833 | Nimav-1_LVa | 95571  | 109052 | c | 0.9952 | 13482 |
| F126 | NW_020870086.1 | 188944 | 202239 | Nimav-1_LVa | 144261 | 157690 | c | 0.9916 | 13430 |
| F183 | NW_020870265.1 | 135963 | 148913 | Nimav-1_LVa | 48695  | 61972  | c | 0.9916 | 13278 |
| F093 | NW_020869804.1 | 297122 | 310161 | Nimav-1_LVa | 108375 | 121482 | c | 0.9969 | 13108 |
| F128 | NW_020870086.1 | 236258 | 249219 | Nimav-1_LVa | 187028 | 200073 | d | 0.9928 | 13046 |
| F323 | NW_020872253.1 | 533177 | 546001 | Nimav-1_LVa | 76961  | 89862  | d | 0.9868 | 12902 |
| F078 | NW_020869739.1 | 60314  | 73167  | Nimav-1_LVa | 56358  | 69228  | c | 0.9953 | 12871 |
| F149 | NW_020870185.1 | 486475 | 499298 | Nimav-1_LVa | 89365  | 102221 | c | 0.9965 | 12857 |
| F255 | NW_020871249.1 | 273042 | 285532 | Nimav-1_LVa | 262772 | 275507 | d | 0.9892 | 12736 |
| F058 | NW_020868841.1 | 181360 | 193855 | Nimav-1_LVa | 123191 | 135889 | c | 0.9875 | 12699 |
| F293 | NW_020871640.1 | 181213 | 193816 | Nimav-1_LVa | 127183 | 139799 | c | 0.9954 | 12617 |
| F307 | NW_020871956.1 | 202983 | 215458 | Nimav-1_LVa | 45164  | 57770  | c | 0.9817 | 12607 |

|             |                |        |        |             |        |        |   |        |       |
|-------------|----------------|--------|--------|-------------|--------|--------|---|--------|-------|
| F042        | NW_020868486.1 | 696924 | 709566 | Nimav-1_LVa | 1246   | 13825  | c | 0.9879 | 12580 |
| F260        | NW_020871249.1 | 456538 | 469038 | Nimav-1_LVa | 89666  | 102221 | d | 0.9933 | 12556 |
| F061        | NW_020869103.1 | 443341 | 455867 | Nimav-1_LVa | 141959 | 154495 | d | 0.9972 | 12537 |
| F295        | NW_020871791.1 | 106534 | 118842 | Nimav-1_LVa | 241708 | 254056 | d | 0.9952 | 12349 |
| F358        | NW_020872350.1 | 78375  | 90636  | Nimav-1_LVa | 146909 | 159241 | c | 0.9957 | 12333 |
| <b>F186</b> | NW_020870265.1 | 162360 | 174155 | Nimav-1_LVa | 34413  | 46586  | c | 0.9840 | 12174 |
| F112        | NW_020870030.1 | 241087 | 253086 | Nimav-1_LVa | 194865 | 206977 | d | 0.9942 | 12113 |
| F254        | NW_020871249.1 | 260961 | 273040 | Nimav-1_LVa | 246486 | 258556 | d | 0.9945 | 12071 |
| F277        | NW_020871384.1 | 91614  | 103610 | Nimav-1_LVa | 242632 | 254689 | d | 0.9943 | 12058 |
| F080        | NW_020869739.1 | 74030  | 85917  | Nimav-1_LVa | 45543  | 57570  | c | 0.9849 | 12028 |
| F111        | NW_020870030.1 | 229166 | 241052 | Nimav-1_LVa | 194907 | 206933 | c | 0.9891 | 12027 |
| F132        | NW_020870086.1 | 274124 | 286120 | Nimav-1_LVa | 212385 | 224388 | d | 0.9865 | 12004 |
| F236        | NW_020871127.1 | 364953 | 376615 | Nimav-1_LVa | 242206 | 254220 | c | 0.9870 | 12015 |
| F248        | NW_020871249.1 | 202272 | 213793 | Nimav-1_LVa | 266442 | 278441 | c | 0.9889 | 12000 |



|      |                |        |        |             |        |        |   |        |       |
|------|----------------|--------|--------|-------------|--------|--------|---|--------|-------|
| F306 | NW_020871803.1 | 99116  | 110938 | Nimav-1_LVa | 8720   | 20732  | c | 0.9915 | 12013 |
| F274 | NW_020871279.1 | 203657 | 215305 | Nimav-1_LVa | 265107 | 277019 | d | 0.9890 | 11913 |
| F092 | NW_020869804.1 | 284250 | 295961 | Nimav-1_LVa | 115055 | 126878 | c | 0.9913 | 11824 |
| F110 | NW_020869942.1 | 96184  | 107801 | Nimav-1_LVa | 6677   | 18394  | d | 0.9925 | 11718 |
| F039 | NW_020868486.1 | 667932 | 679530 | Nimav-1_LVa | 32815  | 44487  | c | 0.9936 | 11673 |
| F088 | NW_020869739.1 | 103354 | 114805 | Nimav-1_LVa | 25999  | 37650  | d | 0.9880 | 11652 |
| F090 | NW_020869804.1 | 253812 | 265387 | Nimav-1_LVa | 146282 | 157866 | c | 0.9887 | 11585 |
| F104 | NW_020869804.1 | 371619 | 383075 | Nimav-1_LVa | 133758 | 145201 | d | 0.9951 | 11444 |
| F286 | NW_020871640.1 | 107676 | 119026 | Nimav-1_LVa | 90157  | 101541 | d | 0.9938 | 11385 |
| F300 | NW_020871791.1 | 153188 | 164448 | Nimav-1_LVa | 247576 | 258892 | d | 0.9943 | 11317 |
| F019 | NW_020868486.1 | 368332 | 379511 | Nimav-1_LVa | 264761 | 275931 | c | 0.9979 | 11171 |
| F077 | NW_020869739.1 | 47374  | 58343  | Nimav-1_LVa | 72607  | 83728  | c | 0.9508 | 11122 |
| F009 | NW_020868315.1 | 349669 | 360506 | Nimav-1_LVa | 248398 | 259492 | d | 0.9880 | 11095 |
| F008 | NW_020868315.1 | 338885 | 349659 | Nimav-1_LVa | 242208 | 253204 | d | 0.9900 | 10997 |

|      |                |        |         |             |        |        |   |        |       |
|------|----------------|--------|---------|-------------|--------|--------|---|--------|-------|
| F108 | NW_020869804.1 | 425138 | 436050  | Nimav-1_LVa | 187565 | 198538 | d | 0.9958 | 10974 |
| F050 | NW_020868486.1 | 817315 | 828510  | Nimav-1_LVa | 40005  | 50942  | c | 0.9680 | 10938 |
| F072 | NW_020869739.1 | 30     | 10583   | Nimav-1_LVa | 204216 | 215133 | c | 0.9858 | 10918 |
| F191 | NW_020870319.1 | 527024 | 537822  | Nimav-1_LVa | 269048 | 279905 | c | 0.9950 | 10858 |
| F012 | NW_020868486.1 | 298639 | 309291  | Nimav-1_LVa | 208260 | 219099 | d | 0.9864 | 10840 |
| F273 | NW_020871279.1 | 190278 | 201008  | Nimav-1_LVa | 267256 | 278083 | d | 0.9916 | 10828 |
| F049 | NW_020868486.1 | 800802 | 811474  | Nimav-1_LVa | 50928  | 61668  | c | 0.9933 | 10741 |
| F174 | NW_020870249.1 | 184864 | 195581  | Nimav-1_LVa | 25939  | 36654  | c | 0.9893 | 10716 |
| F283 | NW_020871640.1 | 76254  | 86896   | Nimav-1_LVa | 53412  | 64124  | d | 0.9940 | 10713 |
| F299 | NW_020871791.1 | 142758 | 153187  | Nimav-1_LVa | 252873 | 263591 | d | 0.9655 | 10719 |
| F252 | NW_020871249.1 | 247470 | 258090  | Nimav-1_LVa | 107986 | 118638 | d | 0.9958 | 10653 |
| F351 | NW_020872253.1 | 992761 | 1003335 | Nimav-1_LVa | 118335 | 128962 | c | 0.9940 | 10628 |
| F070 | NW_020869429.1 | 254346 | 264880  | Nimav-1_LVa | 219478 | 230033 | c | 0.9930 | 10556 |
| F280 | NW_020871640.1 | 37587  | 47933   | Nimav-1_LVa | 34980  | 45452  | d | 0.9800 | 10473 |

|      |                |        |        |             |        |        |   |        |       |
|------|----------------|--------|--------|-------------|--------|--------|---|--------|-------|
| F062 | NW_020869297.1 | 113527 | 123785 | Nimav-1_LVa | 249810 | 260193 | d | 0.9944 | 10384 |
| F168 | NW_020870185.1 | 573895 | 584122 | Nimav-1_LVa | 6581   | 16951  | d | 0.9906 | 10371 |
| F076 | NW_020869739.1 | 31352  | 41554  | Nimav-1_LVa | 92395  | 102614 | c | 0.9970 | 10220 |
| F099 | NW_020869804.1 | 327603 | 337628 | Nimav-1_LVa | 91733  | 101849 | c | 0.9956 | 10117 |
| F241 | NW_020871127.1 | 384171 | 394159 | Nimav-1_LVa | 233878 | 243906 | d | 0.9957 | 10029 |
| F308 | NW_020871956.1 | 225464 | 235527 | Nimav-1_LVa | 27097  | 37071  | c | 0.9906 | 9975  |
| F180 | NW_020870259.1 | 236056 | 245868 | Nimav-1_LVa | 1      | 9875   | c | 0.9933 | 9875  |
| F343 | NW_020872253.1 | 872469 | 882317 | Nimav-1_LVa | 76180  | 86069  | c | 0.9849 | 9890  |
| F342 | NW_020872253.1 | 862666 | 872413 | Nimav-1_LVa | 76287  | 86124  | d | 0.9943 | 9838  |
| F347 | NW_020872253.1 | 924996 | 934732 | Nimav-1_LVa | 76180  | 86006  | d | 0.9938 | 9827  |
| F140 | NW_020870086.1 | 378001 | 387742 | Nimav-1_LVa | 3770   | 13570  | d | 0.9807 | 9801  |
| F103 | NW_020869804.1 | 361916 | 371599 | Nimav-1_LVa | 121498 | 131175 | d | 0.9973 | 9678  |
| F344 | NW_020872253.1 | 882318 | 891891 | Nimav-1_LVa | 27989  | 37650  | c | 0.9950 | 9662  |
| F043 | NW_020868486.1 | 715262 | 724761 | Nimav-1_LVa | 266391 | 276016 | c | 0.9909 | 9626  |

|             |                |        |        |             |        |        |   |        |      |
|-------------|----------------|--------|--------|-------------|--------|--------|---|--------|------|
| <b>F265</b> | NW_020871249.1 | 481461 | 491009 | Nimav-1_LVa | 174499 | 184126 | d | 0.9970 | 9628 |
| F228        | NW_020870984.1 | 618598 | 628327 | Nimav-1_LVa | 31520  | 41125  | d | 0.9809 | 9606 |
| F285        | NW_020871640.1 | 93959  | 103351 | Nimav-1_LVa | 71717  | 81098  | d | 0.9852 | 9382 |
| F041        | NW_020868486.1 | 687961 | 696895 | Nimav-1_LVa | 14376  | 23660  | c | 0.9835 | 9285 |
| F291        | NW_020871640.1 | 162635 | 171846 | Nimav-1_LVa | 142176 | 151416 | d | 0.9973 | 9241 |
| F287        | NW_020871640.1 | 119968 | 129116 | Nimav-1_LVa | 102779 | 111941 | d | 0.9959 | 9163 |
| F357        | NW_020872350.1 | 69240  | 78371  | Nimav-1_LVa | 150159 | 159320 | c | 0.9957 | 9162 |
| F282        | NW_020871640.1 | 67301  | 76219  | Nimav-1_LVa | 45187  | 54294  | d | 0.9784 | 9108 |
| F360        | NW_020872350.1 | 122541 | 131485 | Nimav-1_LVa | 106773 | 115807 | c | 0.9926 | 9035 |
| F074        | NW_020869739.1 | 17547  | 26402  | Nimav-1_LVa | 112476 | 121495 | c | 0.9912 | 9020 |
| F047        | NW_020868486.1 | 788500 | 797138 | Nimav-1_LVa | 65910  | 74836  | c | 0.9794 | 8927 |
| F232        | NW_020871091.1 | 64680  | 73558  | Nimav-1_LVa | 270994 | 279905 | d | 0.9954 | 8912 |
| F137        | NW_020870086.1 | 310466 | 319248 | Nimav-1_LVa | 233695 | 242478 | c | 0.9969 | 8784 |
| F292        | NW_020871640.1 | 171860 | 180589 | Nimav-1_LVa | 142682 | 151433 | c | 0.9939 | 8752 |

|             |                |        |        |             |        |        |   |        |      |
|-------------|----------------|--------|--------|-------------|--------|--------|---|--------|------|
| F338        | NW_020872253.1 | 770466 | 779108 | Nimav-1_LVa | 76178  | 84874  | d | 0.9935 | 8697 |
| F121        | NW_020870086.1 | 143109 | 151880 | Nimav-1_LVa | 169782 | 178440 | c | 0.9785 | 8659 |
| F316        | NW_020872166.1 | 144640 | 152997 | Nimav-1_LVa | 252559 | 261205 | c | 0.9922 | 8647 |
| F198        | NW_020870348.1 | 364681 | 373282 | Nimav-1_LVa | 31983  | 40536  | d | 0.9800 | 8554 |
| <b>F069</b> | NW_020869429.1 | 245827 | 254230 | Nimav-1_LVa | 230346 | 238811 | c | 0.9953 | 8466 |
| F171        | NW_020870185.1 | 615785 | 624125 | Nimav-1_LVa | 49638  | 58001  | d | 0.9936 | 8364 |
| F279        | NW_020871384.1 | 116684 | 124733 | Nimav-1_LVa | 251510 | 259861 | d | 0.9697 | 8352 |
| F150        | NW_020870185.1 | 501124 | 509298 | Nimav-1_LVa | 45853  | 54152  | c | 0.9879 | 8300 |
| F032        | NW_020868486.1 | 523844 | 532030 | Nimav-1_LVa | 45862  | 54143  | c | 0.9891 | 8282 |
| F131        | NW_020870086.1 | 266201 | 274109 | Nimav-1_LVa | 213502 | 221722 | d | 0.9813 | 8221 |
| F278        | NW_020871384.1 | 104148 | 112308 | Nimav-1_LVa | 255741 | 263974 | d | 0.9934 | 8234 |
| F029        | NW_020868486.1 | 501521 | 509480 | Nimav-1_LVa | 112483 | 120692 | c | 0.9898 | 8210 |
| F176        | NW_020870249.1 | 197540 | 205288 | Nimav-1_LVa | 15110  | 23229  | c | 0.9873 | 8120 |
| F001        | NW_020868315.1 | 300001 | 307958 | Nimav-1_LVa | 194243 | 202264 | c | 0.9937 | 8022 |

|      |                |        |        |             |        |        |   |        |      |
|------|----------------|--------|--------|-------------|--------|--------|---|--------|------|
| F096 | NW_020869804.1 | 316278 | 324189 | Nimav-1_LVa | 93523  | 101517 | c | 0.9919 | 7995 |
| F102 | NW_020869804.1 | 353973 | 361915 | Nimav-1_LVa | 112483 | 120385 | d | 0.9725 | 7903 |
| F124 | NW_020870086.1 | 160781 | 168434 | Nimav-1_LVa | 171172 | 178862 | c | 0.9931 | 7691 |
| F196 | NW_020870348.1 | 347332 | 355131 | Nimav-1_LVa | 38835  | 46496  | c | 0.9906 | 7662 |
| F325 | NW_020872253.1 | 557829 | 565461 | Nimav-1_LVa | 83275  | 90924  | c | 0.9954 | 7650 |
| F040 | NW_020868486.1 | 679927 | 687157 | Nimav-1_LVa | 24540  | 31964  | c | 0.9884 | 7425 |
| F115 | NW_020870030.1 | 265267 | 272241 | Nimav-1_LVa | 204216 | 211307 | d | 0.9867 | 7092 |
| F284 | NW_020871640.1 | 87005  | 93725  | Nimav-1_LVa | 64387  | 71451  | d | 0.9870 | 7065 |
| F109 | NW_020869804.1 | 436306 | 443163 | Nimav-1_LVa | 199338 | 206335 | d | 0.9934 | 6998 |
| F142 | NW_020870185.1 | 445728 | 452678 | Nimav-1_LVa | 120475 | 127397 | c | 0.9922 | 6923 |
| F169 | NW_020870185.1 | 584141 | 590933 | Nimav-1_LVa | 17228  | 24046  | d | 0.9960 | 6819 |
| F331 | NW_020872253.1 | 697116 | 703806 | Nimav-1_LVa | 78595  | 85295  | d | 0.9925 | 6701 |
| F023 | NW_020868486.1 | 439640 | 446332 | Nimav-1_LVa | 192192 | 198822 | c | 0.9749 | 6631 |
| F324 | NW_020872253.1 | 551088 | 557726 | Nimav-1_LVa | 90993  | 97625  | d | 0.9931 | 6633 |

|      |                |        |        |             |        |        |   |        |      |
|------|----------------|--------|--------|-------------|--------|--------|---|--------|------|
| F117 | NW_020870086.1 | 92342  | 98557  | Nimav-1_LVa | 114246 | 120692 | d | 0.9820 | 6447 |
| F377 | NW_020872607.1 | 433755 | 439869 | Nimav-1_LVa | 157134 | 163531 | d | 0.9861 | 6398 |
| F056 | NW_020868730.1 | 140906 | 147042 | Nimav-1_LVa | 11326  | 17714  | c | 0.9826 | 6389 |
| F181 | NW_020870259.1 | 245943 | 252255 | Nimav-1_LVa | 273518 | 279905 | c | 0.9946 | 6388 |
| F113 | NW_020870030.1 | 253463 | 259741 | Nimav-1_LVa | 115043 | 121336 | d | 0.9944 | 6294 |
| F123 | NW_020870086.1 | 154278 | 160525 | Nimav-1_LVa | 172704 | 178949 | d | 0.9939 | 6246 |
| F129 | NW_020870086.1 | 249661 | 255969 | Nimav-1_LVa | 200630 | 206862 | d | 0.9816 | 6233 |
| F045 | NW_020868486.1 | 773944 | 779699 | Nimav-1_LVa | 207880 | 213949 | c | 0.9831 | 6070 |
| F221 | NW_020870618.1 | 426231 | 432317 | Nimav-1_LVa | 198643 | 204722 | c | 0.9980 | 6080 |
| F003 | NW_020868315.1 | 313139 | 318778 | Nimav-1_LVa | 201060 | 206901 | d | 0.9864 | 5842 |
| F195 | NW_020870348.1 | 341396 | 347331 | Nimav-1_LVa | 40512  | 46372  | d | 0.9888 | 5861 |
| F165 | NW_020870185.1 | 563597 | 569332 | Nimav-1_LVa | 6677   | 12506  | d | 0.9901 | 5830 |
| F135 | NW_020870086.1 | 303908 | 309517 | Nimav-1_LVa | 239059 | 244799 | d | 0.9804 | 5741 |
| F313 | NW_020871956.1 | 246792 | 252312 | Nimav-1_LVa | 8283   | 13827  | c | 0.9957 | 5545 |

|      |                |        |        |             |        |        |   |        |      |
|------|----------------|--------|--------|-------------|--------|--------|---|--------|------|
| F073 | NW_020869739.1 | 10586  | 16048  | Nimav-1_LVa | 122604 | 128118 | c | 0.9878 | 5515 |
| F290 | NW_020871640.1 | 153801 | 159327 | Nimav-1_LVa | 132984 | 138493 | d | 0.9891 | 5510 |
| F082 | NW_020869739.1 | 88381  | 93722  | Nimav-1_LVa | 45853  | 51321  | c | 0.9850 | 5469 |
| F017 | NW_020868486.1 | 361735 | 366928 | Nimav-1_LVa | 271785 | 277125 | c | 0.9864 | 5341 |
| F002 | NW_020868315.1 | 307959 | 313050 | Nimav-1_LVa | 194352 | 199681 | d | 0.9912 | 5330 |
| F071 | NW_020869429.1 | 264944 | 270119 | Nimav-1_LVa | 214032 | 219177 | c | 0.9900 | 5146 |
| F311 | NW_020871956.1 | 238275 | 243389 | Nimav-1_LVa | 18080  | 23229  | c | 0.9904 | 5150 |
| F105 | NW_020869804.1 | 383087 | 388149 | Nimav-1_LVa | 145505 | 150577 | d | 0.9921 | 5073 |
| F022 | NW_020868486.1 | 433919 | 438949 | Nimav-1_LVa | 199403 | 204454 | c | 0.9863 | 5052 |
| F094 | NW_020869804.1 | 310220 | 315152 | Nimav-1_LVa | 103533 | 108526 | c | 0.9933 | 4994 |
| F267 | NW_020871249.1 | 511314 | 516314 | Nimav-1_LVa | 204517 | 209505 | d | 0.9813 | 4989 |
| F258 | NW_020871249.1 | 404826 | 409779 | Nimav-1_LVa | 106976 | 111941 | d | 0.9978 | 4966 |
| F005 | NW_020868315.1 | 331041 | 335768 | Nimav-1_LVa | 233899 | 238800 | d | 0.9888 | 4902 |
| F114 | NW_020870030.1 | 260506 | 265266 | Nimav-1_LVa | 123168 | 128052 | d | 0.9922 | 4885 |



|      |                |         |         |             |        |        |   |        |      |
|------|----------------|---------|---------|-------------|--------|--------|---|--------|------|
| F075 | NW_020869739.1 | 26403   | 31213   | Nimav-1_LVa | 104166 | 109045 | c | 0.9954 | 4880 |
| F230 | NW_020870984.1 | 664761  | 669460  | Nimav-1_LVa | 195    | 5071   | c | 0.9850 | 4877 |
| F334 | NW_020872253.1 | 727268  | 732098  | Nimav-1_LVa | 32780  | 37648  | d | 0.9952 | 4869 |
| F319 | NW_020872253.1 | 467246  | 471978  | Nimav-1_LVa | 31365  | 36212  | d | 0.9793 | 4848 |
| F231 | NW_020870984.1 | 669984  | 674806  | Nimav-1_LVa | 1      | 4802   | d | 0.9759 | 4802 |
| F373 | NW_020872515.1 | 1075499 | 1080134 | Nimav-1_LVa | 275260 | 279905 | d | 0.9970 | 4646 |
| F172 | NW_020870185.1 | 624196  | 628724  | Nimav-1_LVa | 53411  | 58017  | c | 0.9899 | 4607 |
| F147 | NW_020870185.1 | 478254  | 482686  | Nimav-1_LVa | 152672 | 157212 | c | 0.9894 | 4541 |
| F332 | NW_020872253.1 | 703807  | 708253  | Nimav-1_LVa | 80567  | 85095  | c | 0.9726 | 4529 |
| F185 | NW_020870265.1 | 155503  | 159783  | Nimav-1_LVa | 39469  | 43791  | c | 0.9893 | 4323 |
| F059 | NW_020868866.1 | 442172  | 446421  | Nimav-1_LVa | 171224 | 175476 | d | 0.9988 | 4253 |
| F004 | NW_020868315.1 | 326932  | 331040  | Nimav-1_LVa | 224612 | 228832 | d | 0.9617 | 4221 |
| F146 | NW_020870185.1 | 474061  | 478253  | Nimav-1_LVa | 162639 | 166813 | c | 0.9926 | 4175 |
| F264 | NW_020871249.1 | 477275  | 481460  | Nimav-1_LVa | 162630 | 166809 | d | 0.9899 | 4180 |

|      |                |        |        |             |        |        |   |        |      |
|------|----------------|--------|--------|-------------|--------|--------|---|--------|------|
| F027 | NW_020868486.1 | 494522 | 498477 | Nimav-1_LVa | 136592 | 140693 | c | 0.9750 | 4102 |
| F055 | NW_020868730.1 | 136698 | 140656 | Nimav-1_LVa | 19191  | 23229  | c | 0.9778 | 4039 |
| F197 | NW_020870348.1 | 355670 | 359784 | Nimav-1_LVa | 33995  | 37981  | c | 0.9890 | 3987 |
| F257 | NW_020871249.1 | 400908 | 404738 | Nimav-1_LVa | 102707 | 106655 | d | 0.9891 | 3949 |
| F013 | NW_020868486.1 | 310156 | 313946 | Nimav-1_LVa | 220468 | 224388 | d | 0.9838 | 3921 |
| F173 | NW_020870185.1 | 628725 | 632597 | Nimav-1_LVa | 63268  | 67145  | d | 0.9969 | 3878 |
| F261 | NW_020871249.1 | 469041 | 472906 | Nimav-1_LVa | 148664 | 152560 | d | 0.9951 | 3897 |
| F240 | NW_020871127.1 | 380293 | 384148 | Nimav-1_LVa | 233575 | 237442 | c | 0.9940 | 3868 |
| F246 | NW_020871199.1 | 64315  | 68108  | Nimav-1_LVa | 9961   | 13829  | c | 0.9848 | 3869 |
| F314 | NW_020871956.1 | 252317 | 256112 | Nimav-1_LVa | 12308  | 16109  | c | 0.9515 | 3802 |
| F148 | NW_020870185.1 | 482688 | 486472 | Nimav-1_LVa | 148664 | 152453 | c | 0.9921 | 3790 |
| F224 | NW_020870747.1 | 330125 | 333882 | Nimav-1_LVa | 98394  | 102173 | d | 0.9955 | 3780 |
| F234 | NW_020871127.1 | 358439 | 362114 | Nimav-1_LVa | 257468 | 261214 | c | 0.9897 | 3747 |
| F262 | NW_020871249.1 | 472907 | 476420 | Nimav-1_LVa | 152653 | 156217 | d | 0.9943 | 3565 |

|      |                |        |        |             |        |        |   |        |      |
|------|----------------|--------|--------|-------------|--------|--------|---|--------|------|
| F312 | NW_020871956.1 | 243405 | 246785 | Nimav-1_LVa | 14348  | 17860  | c | 0.9886 | 3513 |
| F048 | NW_020868486.1 | 797375 | 800794 | Nimav-1_LVa | 61844  | 65340  | c | 0.9890 | 3497 |
| F021 | NW_020868486.1 | 407762 | 411183 | Nimav-1_LVa | 230341 | 233808 | c | 0.9766 | 3468 |
| F133 | NW_020870086.1 | 291468 | 294968 | Nimav-1_LVa | 227962 | 231380 | d | 0.9812 | 3419 |
| F203 | NW_020870398.1 | 170295 | 173716 | Nimav-1_LVa | 76180  | 79594  | d | 0.9895 | 3415 |
| F155 | NW_020870185.1 | 517113 | 520201 | Nimav-1_LVa | 21170  | 24525  | c | 0.9781 | 3356 |
| F167 | NW_020870185.1 | 570703 | 573894 | Nimav-1_LVa | 3025   | 6307   | d | 0.9855 | 3283 |
| F189 | NW_020870265.1 | 194730 | 198000 | Nimav-1_LVa | 12388  | 15674  | d | 0.9945 | 3287 |
| F361 | NW_020872403.1 | 739276 | 742301 | Nimav-1_LVa | 90431  | 93472  | c | 0.9921 | 3042 |
| F294 | NW_020871640.1 | 204695 | 207641 | Nimav-1_LVa | 118002 | 120970 | c | 0.9939 | 2969 |
| F247 | NW_020871199.1 | 70315  | 73102  | Nimav-1_LVa | 6497   | 9429   | c | 0.9564 | 2933 |
| F057 | NW_020868730.1 | 147043 | 149905 | Nimav-1_LVa | 7301   | 10185  | c | 0.9919 | 2885 |
| F350 | NW_020872253.1 | 989886 | 992757 | Nimav-1_LVa | 126167 | 129043 | d | 0.9951 | 2877 |
| F153 | NW_020870185.1 | 512018 | 514815 | Nimav-1_LVa | 27572  | 30418  | c | 0.9843 | 2847 |

|      |                |        |        |             |        |        |   |        |      |
|------|----------------|--------|--------|-------------|--------|--------|---|--------|------|
| F201 | NW_020870398.1 | 138106 | 140901 | Nimav-1_LVa | 6581   | 9429   | d | 0.9705 | 2849 |
| F033 | NW_020868486.1 | 532032 | 534817 | Nimav-1_LVa | 27568  | 30393  | c | 0.9871 | 2826 |
| F035 | NW_020868486.1 | 537079 | 539648 | Nimav-1_LVa | 21665  | 24499  | c | 0.9853 | 2835 |
| F179 | NW_020870249.1 | 216234 | 219081 | Nimav-1_LVa | 1      | 2803   | c | 0.9621 | 2803 |
| F253 | NW_020871249.1 | 258185 | 260960 | Nimav-1_LVa | 119752 | 122542 | d | 0.9892 | 2791 |
| F160 | NW_020870185.1 | 556296 | 559229 | Nimav-1_LVa | 2066   | 4844   | d | 0.9568 | 2779 |
| F199 | NW_020870398.1 | 130899 | 133383 | Nimav-1_LVa | 1      | 2602   | d | 0.9791 | 2602 |
| F034 | NW_020868486.1 | 534818 | 537074 | Nimav-1_LVa | 24806  | 27369  | c | 0.9741 | 2564 |
| F139 | NW_020870086.1 | 375172 | 377686 | Nimav-1_LVa | 1      | 2538   | d | 0.9893 | 2538 |
| F154 | NW_020870185.1 | 514816 | 517112 | Nimav-1_LVa | 24816  | 27369  | c | 0.9688 | 2554 |
| F006 | NW_020868315.1 | 335777 | 338307 | Nimav-1_LVa | 239289 | 241781 | c | 0.9530 | 2493 |
| F238 | NW_020871127.1 | 377191 | 379703 | Nimav-1_LVa | 239289 | 241781 | d | 0.9601 | 2493 |
| F081 | NW_020869739.1 | 85926  | 88369  | Nimav-1_LVa | 42050  | 44509  | c | 0.9951 | 2460 |
| F026 | NW_020868486.1 | 491212 | 493417 | Nimav-1_LVa | 137752 | 140173 | d | 0.9682 | 2422 |

|      |                |        |        |             |        |        |   |        |      |
|------|----------------|--------|--------|-------------|--------|--------|---|--------|------|
| F046 | NW_020868486.1 | 779701 | 782106 | Nimav-1_LVa | 194698 | 197132 | c | 0.9929 | 2435 |
| F014 | NW_020868486.1 | 313947 | 316316 | Nimav-1_LVa | 224627 | 227006 | d | 0.9975 | 2380 |
| F107 | NW_020869804.1 | 408078 | 410507 | Nimav-1_LVa | 167697 | 170082 | d | 0.9750 | 2386 |
| F184 | NW_020870265.1 | 148927 | 151307 | Nimav-1_LVa | 46679  | 49065  | d | 0.9983 | 2387 |
| F226 | NW_020870747.1 | 348949 | 351317 | Nimav-1_LVa | 119836 | 122208 | d | 0.9979 | 2373 |
| F298 | NW_020871791.1 | 134533 | 136912 | Nimav-1_LVa | 264123 | 266498 | d | 0.9958 | 2376 |
| F356 | NW_020872350.1 | 62165  | 64483  | Nimav-1_LVa | 163514 | 165885 | c | 0.9887 | 2372 |
| F084 | NW_020869739.1 | 94167  | 96474  | Nimav-1_LVa | 45853  | 48192  | c | 0.9727 | 2340 |
| F337 | NW_020872253.1 | 768109 | 770465 | Nimav-1_LVa | 35287  | 37647  | d | 0.9970 | 2361 |
| F100 | NW_020869804.1 | 337630 | 339914 | Nimav-1_LVa | 91862  | 94155  | d | 0.9921 | 2294 |
| F152 | NW_020870185.1 | 509743 | 512016 | Nimav-1_LVa | 45866  | 48157  | c | 0.9642 | 2292 |
| F063 | NW_020869297.1 | 123798 | 126044 | Nimav-1_LVa | 260294 | 262561 | d | 0.9956 | 2268 |
| F085 | NW_020869739.1 | 96479  | 98687  | Nimav-1_LVa | 28188  | 30393  | c | 0.9804 | 2206 |
| F272 | NW_020871279.1 | 188078 | 190264 | Nimav-1_LVa | 264578 | 266765 | d | 0.9959 | 2188 |

|      |                |        |        |             |        |        |   |        |      |
|------|----------------|--------|--------|-------------|--------|--------|---|--------|------|
| F098 | NW_020869804.1 | 325446 | 327602 | Nimav-1_LVa | 99697  | 101854 | d | 0.9981 | 2158 |
| F163 | NW_020870185.1 | 560434 | 562470 | Nimav-1_LVa | 3025   | 5071   | d | 0.9810 | 2047 |
| F243 | NW_020871127.1 | 416177 | 418202 | Nimav-1_LVa | 267231 | 269268 | d | 0.9877 | 2038 |
| F028 | NW_020868486.1 | 499572 | 501520 | Nimav-1_LVa | 134031 | 135908 | c | 0.9803 | 1878 |
| F118 | NW_020870086.1 | 98558  | 100485 | Nimav-1_LVa | 134031 | 135890 | d | 0.9682 | 1860 |
| F354 | NW_020872350.1 | 53135  | 54846  | Nimav-1_LVa | 195819 | 197657 | c | 0.9688 | 1839 |
| F122 | NW_020870086.1 | 151881 | 153655 | Nimav-1_LVa | 169827 | 171607 | d | 0.9804 | 1781 |
| F288 | NW_020871640.1 | 129117 | 130833 | Nimav-1_LVa | 114474 | 116201 | d | 0.9925 | 1728 |
| F188 | NW_020870265.1 | 193011 | 194729 | Nimav-1_LVa | 12244  | 13964  | c | 0.9954 | 1721 |
| F355 | NW_020872350.1 | 54849  | 56494  | Nimav-1_LVa | 191730 | 193403 | c | 0.9921 | 1674 |
| F143 | NW_020870185.1 | 452679 | 454279 | Nimav-1_LVa | 120415 | 122030 | d | 0.9944 | 1616 |
| F010 | NW_020868315.1 | 365609 | 367115 | Nimav-1_LVa | 258268 | 259815 | d | 0.9620 | 1548 |
| F249 | NW_020871249.1 | 213812 | 215226 | Nimav-1_LVa | 264482 | 266031 | c | 0.9805 | 1550 |
| F309 | NW_020871956.1 | 235938 | 237409 | Nimav-1_LVa | 24594  | 26070  | c | 0.9919 | 1477 |

|      |                |        |        |             |        |        |   |        |      |
|------|----------------|--------|--------|-------------|--------|--------|---|--------|------|
| F378 | NW_020872607.1 | 443390 | 444773 | Nimav-1_LVa | 163514 | 164978 | d | 0.9813 | 1465 |
| F018 | NW_020868486.1 | 366929 | 368325 | Nimav-1_LVa | 271406 | 272803 | d | 0.9979 | 1398 |
| F166 | NW_020870185.1 | 569333 | 570702 | Nimav-1_LVa | 3154   | 4541   | d | 0.9726 | 1388 |
| F089 | NW_020869739.1 | 114806 | 116175 | Nimav-1_LVa | 76180  | 77545  | d | 0.9949 | 1366 |
| F097 | NW_020869804.1 | 324202 | 325445 | Nimav-1_LVa | 99690  | 100941 | c | 0.9936 | 1252 |
| F235 | NW_020871127.1 | 362209 | 363477 | Nimav-1_LVa | 263258 | 264525 | c | 0.9905 | 1268 |
| F178 | NW_020870249.1 | 208560 | 209705 | Nimav-1_LVa | 9961   | 11156  | c | 0.9646 | 1196 |
| F320 | NW_020872253.1 | 471979 | 473185 | Nimav-1_LVa | 35159  | 36369  | c | 0.9909 | 1211 |
| F164 | NW_020870185.1 | 562474 | 563596 | Nimav-1_LVa | 5179   | 6307   | d | 0.9858 | 1129 |
| F229 | NW_020870984.1 | 663651 | 664758 | Nimav-1_LVa | 5181   | 6307   | c | 0.9892 | 1127 |
| F031 | NW_020868486.1 | 522834 | 523834 | Nimav-1_LVa | 94439  | 95526  | c | 0.9635 | 1088 |
| F318 | NW_020872253.1 | 465447 | 466518 | Nimav-1_LVa | 28821  | 29898  | d | 0.9787 | 1078 |
| F297 | NW_020871791.1 | 133545 | 134532 | Nimav-1_LVa | 262629 | 263624 | d | 0.9859 | 996  |
| F051 | NW_020868730.1 | 91344  | 92321  | Nimav-1_LVa | 70144  | 71110  | c | 0.9714 | 967  |

|      |                |        |        |             |        |        |   |        |     |
|------|----------------|--------|--------|-------------|--------|--------|---|--------|-----|
| F036 | NW_020868486.1 | 539649 | 540475 | Nimav-1_LVa | 20635  | 21561  | c | 0.9678 | 927 |
| F145 | NW_020870185.1 | 473147 | 474060 | Nimav-1_LVa | 174503 | 175417 | c | 0.9891 | 915 |
| F136 | NW_020870086.1 | 309578 | 310465 | Nimav-1_LVa | 245122 | 246012 | d | 0.9966 | 891 |
| F079 | NW_020869739.1 | 73169  | 74027  | Nimav-1_LVa | 56638  | 57497  | d | 0.9814 | 860 |
| F263 | NW_020871249.1 | 476421 | 477274 | Nimav-1_LVa | 156333 | 157203 | d | 0.9814 | 871 |
| F301 | NW_020871791.1 | 164449 | 165311 | Nimav-1_LVa | 259592 | 260454 | d | 0.9919 | 863 |
| F162 | NW_020870185.1 | 559668 | 560426 | Nimav-1_LVa | 3019   | 3777   | d | 0.9685 | 759 |
| F095 | NW_020869804.1 | 315153 | 315885 | Nimav-1_LVa | 101440 | 102172 | c | 0.9891 | 733 |
| F134 | NW_020870086.1 | 302665 | 303355 | Nimav-1_LVa | 236711 | 237408 | d | 0.9913 | 698 |
| F119 | NW_020870086.1 | 101589 | 102169 | Nimav-1_LVa | 136596 | 137176 | d | 0.9556 | 581 |
| F239 | NW_020871127.1 | 379712 | 380292 | Nimav-1_LVa | 238209 | 238800 | c | 0.9585 | 592 |
| F087 | NW_020869739.1 | 101935 | 102489 | Nimav-1_LVa | 23968  | 24517  | d | 0.9586 | 550 |
| F130 | NW_020870086.1 | 263093 | 263658 | Nimav-1_LVa | 201938 | 202500 | c | 0.9510 | 563 |
| F177 | NW_020870249.1 | 207979 | 208542 | Nimav-1_LVa | 11280  | 11847  | c | 0.9912 | 568 |



|      |                |        |        |             |        |        |   |        |     |
|------|----------------|--------|--------|-------------|--------|--------|---|--------|-----|
| F054 | NW_020868730.1 | 136164 | 136697 | Nimav-1_LVa | 23995  | 24525  | c | 0.9664 | 531 |
| F175 | NW_020870249.1 | 197012 | 197539 | Nimav-1_LVa | 23995  | 24525  | c | 0.9755 | 531 |
| F310 | NW_020871956.1 | 237742 | 238274 | Nimav-1_LVa | 23995  | 24525  | c | 0.9813 | 531 |
| F083 | NW_020869739.1 | 93727  | 94166  | Nimav-1_LVa | 29951  | 30393  | c | 0.9751 | 443 |
| F151 | NW_020870185.1 | 509303 | 509742 | Nimav-1_LVa | 29950  | 30393  | c | 0.9729 | 444 |
| F161 | NW_020870185.1 | 559230 | 559667 | Nimav-1_LVa | 4098   | 4536   | d | 0.9500 | 439 |
| F007 | NW_020868315.1 | 338461 | 338881 | Nimav-1_LVa | 241792 | 242212 | c | 0.9667 | 421 |
| F237 | NW_020871127.1 | 376617 | 377035 | Nimav-1_LVa | 241792 | 242210 | d | 0.9689 | 419 |
| F086 | NW_020869739.1 | 98702  | 99159  | Nimav-1_LVa | 18262  | 18656  | c | 0.9597 | 395 |
| F158 | NW_020870185.1 | 553000 | 553385 | Nimav-1_LVa | 3340   | 3725   | c | 0.9742 | 386 |
| F159 | NW_020870185.1 | 553386 | 553767 | Nimav-1_LVa | 3718   | 4097   | c | 0.9738 | 380 |
| F200 | NW_020870398.1 | 133689 | 134063 | Nimav-1_LVa | 2443   | 2818   | d | 0.9515 | 376 |
| F376 | NW_020872607.1 | 433269 | 433609 | Nimav-1_LVa | 156323 | 156673 | d | 0.9710 | 351 |
| F317 | NW_020872166.1 | 152998 | 153269 | Nimav-1_LVa | 249972 | 250243 | c | 0.9816 | 272 |

|      |                |        |        |             |        |        |   |        |     |
|------|----------------|--------|--------|-------------|--------|--------|---|--------|-----|
| F065 | NW_020869429.1 | 159484 | 159711 | Nimav-1_LVa | 224391 | 224621 | c | 0.9652 | 231 |
| F066 | NW_020869429.1 | 173876 | 174103 | Nimav-1_LVa | 224386 | 224613 | d | 0.9605 | 228 |
| F067 | NW_020869429.1 | 192004 | 192231 | Nimav-1_LVa | 224386 | 224613 | c | 0.9868 | 228 |
| F068 | NW_020869429.1 | 235853 | 236078 | Nimav-1_LVa | 224388 | 224613 | c | 0.9779 | 226 |
| F193 | NW_020870319.1 | 581879 | 582104 | Nimav-1_LVa | 224388 | 224613 | c | 0.9646 | 226 |
| F206 | NW_020870618.1 | 55691  | 55915  | Nimav-1_LVa | 224388 | 224613 | d | 0.9867 | 226 |
| F207 | NW_020870618.1 | 90851  | 91076  | Nimav-1_LVa | 224386 | 224613 | d | 0.9824 | 228 |
| F208 | NW_020870618.1 | 99079  | 99301  | Nimav-1_LVa | 224389 | 224613 | d | 0.9866 | 225 |
| F209 | NW_020870618.1 | 174420 | 174647 | Nimav-1_LVa | 224387 | 224613 | d | 0.9561 | 227 |
| F210 | NW_020870618.1 | 180562 | 180786 | Nimav-1_LVa | 224387 | 224613 | d | 0.9867 | 227 |
| F211 | NW_020870618.1 | 268204 | 268431 | Nimav-1_LVa | 224386 | 224613 | d | 0.9825 | 228 |
| F212 | NW_020870618.1 | 268474 | 268698 | Nimav-1_LVa | 224387 | 224613 | d | 0.9823 | 227 |
| F213 | NW_020870618.1 | 283561 | 283793 | Nimav-1_LVa | 224386 | 224613 | c | 0.9696 | 228 |
| F214 | NW_020870618.1 | 290010 | 290234 | Nimav-1_LVa | 224387 | 224613 | d | 0.9823 | 227 |

|      |                |        |        |             |        |        |   |        |     |
|------|----------------|--------|--------|-------------|--------|--------|---|--------|-----|
| F215 | NW_020870618.1 | 329445 | 329667 | Nimav-1_LVa | 224389 | 224613 | d | 0.9777 | 225 |
| F216 | NW_020870618.1 | 390383 | 390608 | Nimav-1_LVa | 224386 | 224613 | d | 0.9824 | 228 |
| F217 | NW_020870618.1 | 390640 | 390867 | Nimav-1_LVa | 224386 | 224613 | d | 0.9825 | 228 |
| F218 | NW_020870618.1 | 390899 | 391126 | Nimav-1_LVa | 224386 | 224613 | d | 0.9825 | 228 |
| F219 | NW_020870618.1 | 391177 | 391402 | Nimav-1_LVa | 224386 | 224613 | d | 0.9780 | 228 |
| F220 | NW_020870618.1 | 413945 | 414164 | Nimav-1_LVa | 224391 | 224613 | d | 0.9820 | 223 |
| F222 | NW_020870618.1 | 489954 | 490178 | Nimav-1_LVa | 224387 | 224613 | d | 0.9823 | 227 |
| F362 | NW_020872505.1 | 2685   | 2911   | Nimav-1_LVa | 224383 | 224613 | d | 0.9696 | 231 |
| F365 | NW_020872505.1 | 280580 | 280799 | Nimav-1_LVa | 224392 | 224613 | d | 0.9774 | 222 |
| F366 | NW_020872505.1 | 321304 | 321527 | Nimav-1_LVa | 224392 | 224613 | d | 0.9820 | 222 |
| F367 | NW_020872505.1 | 330596 | 330814 | Nimav-1_LVa | 224392 | 224612 | d | 0.9864 | 221 |
| F368 | NW_020872505.1 | 490523 | 490743 | Nimav-1_LVa | 224391 | 224613 | d | 0.9820 | 223 |
| F369 | NW_020872505.1 | 503120 | 503340 | Nimav-1_LVa | 224391 | 224613 | d | 0.9820 | 223 |
| F370 | NW_020872505.1 | 524087 | 524305 | Nimav-1_LVa | 224393 | 224613 | d | 0.9773 | 221 |

|      |                |        |        |                 |        |        |   |        |     |
|------|----------------|--------|--------|-----------------|--------|--------|---|--------|-----|
| F371 | NW_020872505.1 | 584743 | 584960 | Nimav-<br>1_LVa | 224394 | 224613 | d | 0.9863 | 220 |
| F372 | NW_020872515.1 | 300563 | 300789 | Nimav-<br>1_LVa | 224388 | 224613 | c | 0.9559 | 226 |
| F379 | NW_020872607.1 | 528133 | 528358 | Nimav-<br>1_LVa | 224386 | 224613 | c | 0.9782 | 228 |
