# Supplementary material for: The Complete Genome of an Endogenous Nimavirus (Nimav-1_LVa) From the Pacific Whiteleg Shrimp Penaeus (Litopenaeus) Vannamei
Source: MDPI journal article supplement (doi:10.3390/genes11010094), 2020-01-14
Supplement: s1 [file s1]

**Fig S1**

|                       |                                                                           |    |
|-----------------------|---------------------------------------------------------------------------|----|
| <i>140p/462</i>       | Y Y M G F Y K V H N D - A F I P K I G L E F S A G S D L Y S L - F P C T I | 46 |
| <i>140p_Ht/542</i>    | Y C L G F R K T H T D - A I V P K V A T G F S A G S D L H A L - F S C A I | 84 |
| <i>140p_Mj/146</i>    | S L L K F K K L T E H - A F T P S K G S K F A A G F D L C S A - Y D L T I | 40 |
| <i>GAV93148.1/322</i> | D I L N F Q K V H Q D - A I P Y R A T S G S A G Y D V Y S R N E E I T L   | 65 |
| <i>AAL33116.1/461</i> | V F M R E A P P G E E T A L P P R R A T P G S V A Y D L F P S - E E M D I | 43 |

47 PSNHWAEIRTGVAL - KF  
85 HAGDQVEVRTGAAL - EF  
41 PANGLKSLVKTDIQV - EL  
66 CANGQIKIYTGIRVVKF  
44 EPMGLAKISTGYGIDKF

108 - - - - - D A S F F L K I R S R S G M A L N H N I  
169 D V I Q I K N E R F F L K I R S R S G M A A N H N I  
57 - - - - - P E G C Y G R I A P R S G L S W K Y H L  
83 - - - - - P E G C Y G R L A C S S G W A F A N K L  
61 - - - - - P D G C Y G Q I V S R S G M T W K N N T

N V Q A G V I D A D Y R G E V K V L I N N R S S 275  
T V Q A G V I D A D Y R G E V K V V L R N G S K 351  
N I G A G V V D R D Y R G N V G V I L F N H A K 100  
Y I P S G V I D P D Y E G E I I V P L C T T S N 126  
S V P T G T I D V D Y R G E L K V I L R N H S A 104

276 GNTLRVRAKQPVAMGVVYNIACP--REI--EIKHPENVKPIDGNM 318  
352 DQIFEIEPGMPLAMGVLYDVACPV--TRLIGAIGAIEDHIRIDDGR 395  
101 TD-YKVKKGDRIAQLICEKIIYPD----- 123  
127 TD-LLIEPNRRVAQLVIERISTPP-----VYETLANGEMVR---N 162  
105 EKSVPPIRKGTSLAQLIFLRY-CDVEEEQIVYINETTGERTIIDSSS 149
