# Supplementary material for: The Complete Genome of an Endogenous Nimavirus (Nimav-1_LVa) From the Pacific Whiteleg Shrimp Penaeus (Litopenaeus) Vannamei
Source: MDPI journal article supplement (doi:10.3390/genes11010094), 2020-01-14
Supplement: s1 [file s1]

Fig S2

|                 |              |                  |                  |                     |             |              |           |                       |                   |
|-----------------|--------------|------------------|------------------|---------------------|-------------|--------------|-----------|-----------------------|-------------------|
| 225p/689        | EDCKC-KERTSS | PFVMDQDT-----    | EFWNRNTMLRLNIFK  | 221                 |             |              |           |                       |                   |
| 225p_Mj/436     | PNCKCDRQLRNS | VFVSNIDV-----    | NYWSDDSK-RYNIFR  | 58                  |             |              |           |                       |                   |
| GBG35515.1/1080 | QECLSLAEEM   | GS PF-----       | NLNGLDTFWVQDKR-- | KTYLQ 354           |             |              |           |                       |                   |
| GBG35474.1/1113 | WDTETASNKF   | GHPYLPDEESVAIVEK | FWNKDNR-KIKYLA   | 173                 |             |              |           |                       |                   |
| AKS10608.1/996  | WLFEIAADEFG  | APYIPDQKSVAAVEN  | FWAKDNR-KKKYLS   | 130                 |             |              |           |                       |                   |
| GBG35591.1/1081 | SLFRVAADEFG  | APYLPDQKSINSVEN  | FWGVDDR-KKKYLS   | 194                 |             |              |           |                       |                   |
| SCV_077+078/988 | ADHET-AREFG  | HPYLPDIEKLETVEN  | FWCQE-R-KQRYLG   | 122                 |             |              |           |                       |                   |
| AIX03672.1/936  | GICEEAAAN-   | GRPYLPTLEMRNEVDH | FWSQDNR-KLKLKG   | 72                  |             |              |           |                       |                   |
|                 | YF-NNLVLAEF  | ACGKLELFE        | TVDR             | LSMLREILTPLLYKI 260 |             |              |           |                       |                   |
|                 | YFTKNTVFD    | SFIK-DGDLVN      | TVEKL            | LSMLRELLVPFFYQM 97  |             |              |           |                       |                   |
|                 | HLDNNVVIKS   | FINGDICA         | VQF IGLL         | LSMATEILRPTMYRL 394 |             |              |           |                       |                   |
|                 | HLVGNYS      | IKCFIEGT         | IDTKCVGFL        | LSMATAHGC           | GTIFKL 213  |              |           |                       |                   |
|                 | HLRGNHF      | IECFINGS         | IDARTCVGML       | LSIATEYGYGS         | VHNV 170    |              |           |                       |                   |
|                 | HLRGN        | SFIGYF           | IDGI             | DAKTCVGML           | LSIATEYGYRS | IYNV 234     |           |                       |                   |
|                 | HLKGN        | SVIADF           | INGD             | IDVIVFVGLL          | LSYATEF     | GYTTLKNL 162 |           |                       |                   |
|                 | HFCGN        | LYVEAF           | IAGS             | IDAETCVGFL          | LSQATGL     | GYPLLKKL 112 |           |                       |                   |
|                 |              |                  |                  |                     |             | IWDTSYP 294  |           |                       |                   |
|                 |              |                  |                  |                     |             | EWDTAYP 133  |           |                       |                   |
|                 |              |                  |                  |                     |             | RPHSLHS 444  |           |                       |                   |
|                 |              |                  |                  |                     |             | RPESLHP 265  |           |                       |                   |
|                 |              |                  |                  |                     |             | KPDSLHP 221  |           |                       |                   |
|                 |              |                  |                  |                     |             | KPDSLHP 287  |           |                       |                   |
|                 |              |                  |                  |                     |             | RPNSLHP 213  |           |                       |                   |
|                 |              |                  |                  |                     |             | RPSSIQN 153  |           |                       |                   |
| 336             | LKCVIAL      | LITPS-N          | ISEVYDLSP        | 466                 | KLAIIL      | CGIYGNL      | KI IAGNSS | SKLESYFLN             |                   |
| 171             | IKSIIA       | LITPS-N          | FQVYRPS          | 295                 | KYFIAL      | CGKYENL      | KFIPGN    | CSKIENFFLY            |                   |
| 486             | LQSLICA      | IVIPC-           | IVDEVLDLGP       | 684                 | RAFIS       | IVGSY        | GRLHLVT   | GRINRVYTAFMD          |                   |
| 307             | LTNLICA      | LIMPAY           | TLKEMLSLGG       | 495                 | RAILT       | ISGSY        | GWFS      | LVVGYTSTSDTLFAE       |                   |
| 264             | LNNII        | ICAIIMP          | AYTFDEMMALNG     | 442                 | RNVL        | ILSGNY       | GWFG      | LTGHILSPDIFFE         |                   |
| 330             | LTNLICA      | LIMPAY           | TFDEVMALSG       | 497                 | RNVL        | ILSGNY       | GWFG      | LTGHTPSPDILFAE        |                   |
| 255             | ITNLL        | YAILIP           | AYSILELLDLGF     | 463                 | RSIL        | PLSGSY       | GWFG      | LVGTGNVQGPDLFSE       |                   |
| 198             | LQNL         | IVAAIL           | IPAYTET          | FVLD                | TGN 335     | RGVLT        | VS        | GDYGWFSVIVGSTIMPSVLFY |                   |
|                 | KNAFFT       | TKGLS            | SKSYIHNS         | REA-I               | IGI--       | VFMHNF       | ACLFND    | TLHHFKFNDD 568        |                   |
|                 | DNAFFT       | SGVSC            | QSYIGNS          | REH-I               | IGV--       | VHMNDF       | VQLFND    | TLNIFKMYKK 398        |                   |
|                 | DNVFFT       | TREDN            | ANIFHCK          | GLCR-V              | FGL--       | VPESRH       | MDLFRNS   | RHLFQRMIN 817         |                   |
|                 | SNLFYT       | QLGY             | PCWYE            | ADSLSG-V            | FGN--       | VELSKH       | VEVFDGS   | IQNFYHFLD 646         |                   |
|                 | ENPFV        | TRMGYP           | QWYNSES          | LSA-I               | FGE--       | VDLTDH       | VAAALDHT  | MDKFVKLVE 600         |                   |
|                 | KNPFV        | TRMGYP           | QWYN             | SKGLGD-I            | FEK--       | VDLKD        | HVAALDY   | TMDKFVKLME 659        |                   |
|                 | HNPFF        | TRSGT            | PSWYN            | PDGLEQ-V            | FGR--       | VEYKD        | HVKVYDD   | TIHLFKHLAE 626        |                   |
|                 | KNPFF        | IRHTE            | PKWYN            | KNAMCGE             | VLEN        | VGVTLE       | QHV       | RVSD                  | DEYMDREFGSLLL 489 |
|                 | EEKL         | RDN              | ASYLLRL          | ILKNT               | GRVLY       | STGYVWG      | 604       |                       |                   |
|                 | EQRKR        | KSC              | SELLKL           | ILKNS               | ARVL        | TQRGYVWS     | 432       |                       |                   |
|                 | MADM         | RRQA             | ASLIA            | HLHKIS              | IRQH        | IRTGRIRG     | 911       |                       |                   |
|                 | EAEI         | RLTA             | QDLYRYM          | CRMS                | ARLY        | FSCMLLRG     | 812       |                       |                   |
|                 | EGEC         | RIA              | AHDLYKY          | IYRNS               | ARQY        | IRSSLIRG     | 767       |                       |                   |
|                 | DGEC         | RIA              | AHDLYKY          | MYRNS               | ARQY        | IRSSLIRG     | 826       |                       |                   |
|                 | EGEC         | RVV              | SHDLL            | RHLYKSS             | AKNL        | IRHTIMRG     | 785       |                       |                   |
|                 | EAEI         | REC              | ANELV            | RELYRAS             | ARSY        | VHDLVLKR     | 667       |                       |                   |
